# Supplementary material
Source: PubMed Central journal article supplement (PMC3414877)
Supplement: mmc1.pdf [file mmc1.pdf]

Supplementary Information for:

*Binding of Congo red to amyloid protofibrils of the Alzheimer A $\beta$ <sub>9-40</sub> peptide probed by molecular dynamics simulations by Chun Wu, Justin Scott and Joan-Emma sheal*

Table S1 This table list the initial contact residues and the final binding mode between the protofibril and the two CRs (one binds to the N-terminal (Nt) sheet-layer and the other binds to the C-terminal (Ct) sheet-layer) in the first seven trajectories. Only cases in which no CR dimers are formed are considered here (Figure S4).

| Traj. ID | Binding to Nt- sheet-layer |                            | Binding to Ct-sheet-layer |                            |
|----------|----------------------------|----------------------------|---------------------------|----------------------------|
|          | Initial Contact residues   | Final binding mode         | Initial Contact residues  | Final binding mode         |
| 1        | K16                        | Groove F20_V18_K16         | I31                       | Parallel to $\beta$ -stand |
| 2        | K16                        | Groove K16_H14_V12         | A30,I31,M35               | Parallel to $\beta$ -stand |
| 3        | K16, F20                   | Groove F20_V18_K16         | M35                       | Groove I31_M35             |
| 4        | K16                        | Groove H14_V12             | G37                       | Groove G20_I31             |
| 5        | K16                        | Parallel to $\beta$ -stand | V40                       | Sheet edges                |
| 6        | K16                        | Groove F20_V18_K16         | G38                       | Parallel to $\beta$ -stand |
| 7        | K16, H14                   | Groove K16_H14_V12         | V39                       | Sheet edges                |

Figure S1 the constructed starting structure for the binding simulations.

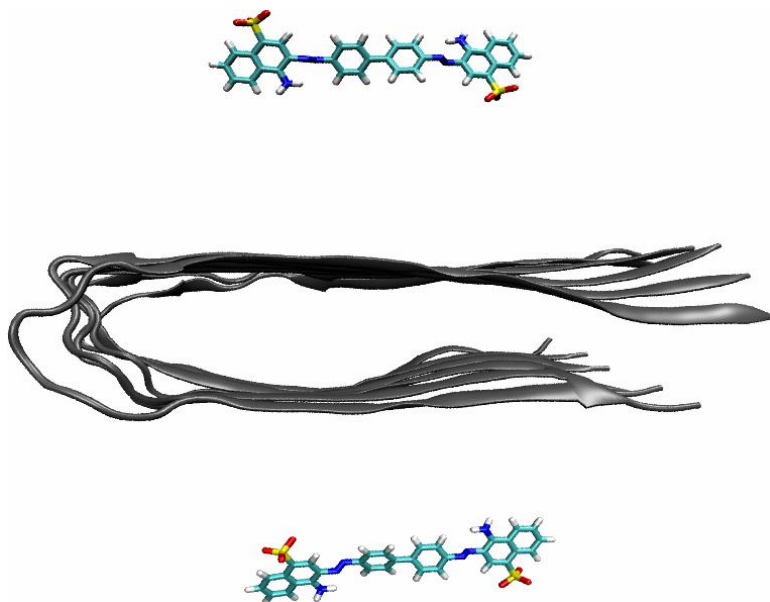

Figure S2 C $\alpha$  RMSD of the A $\beta$ <sub>9-40</sub> protofibril in all 8 trajectories.

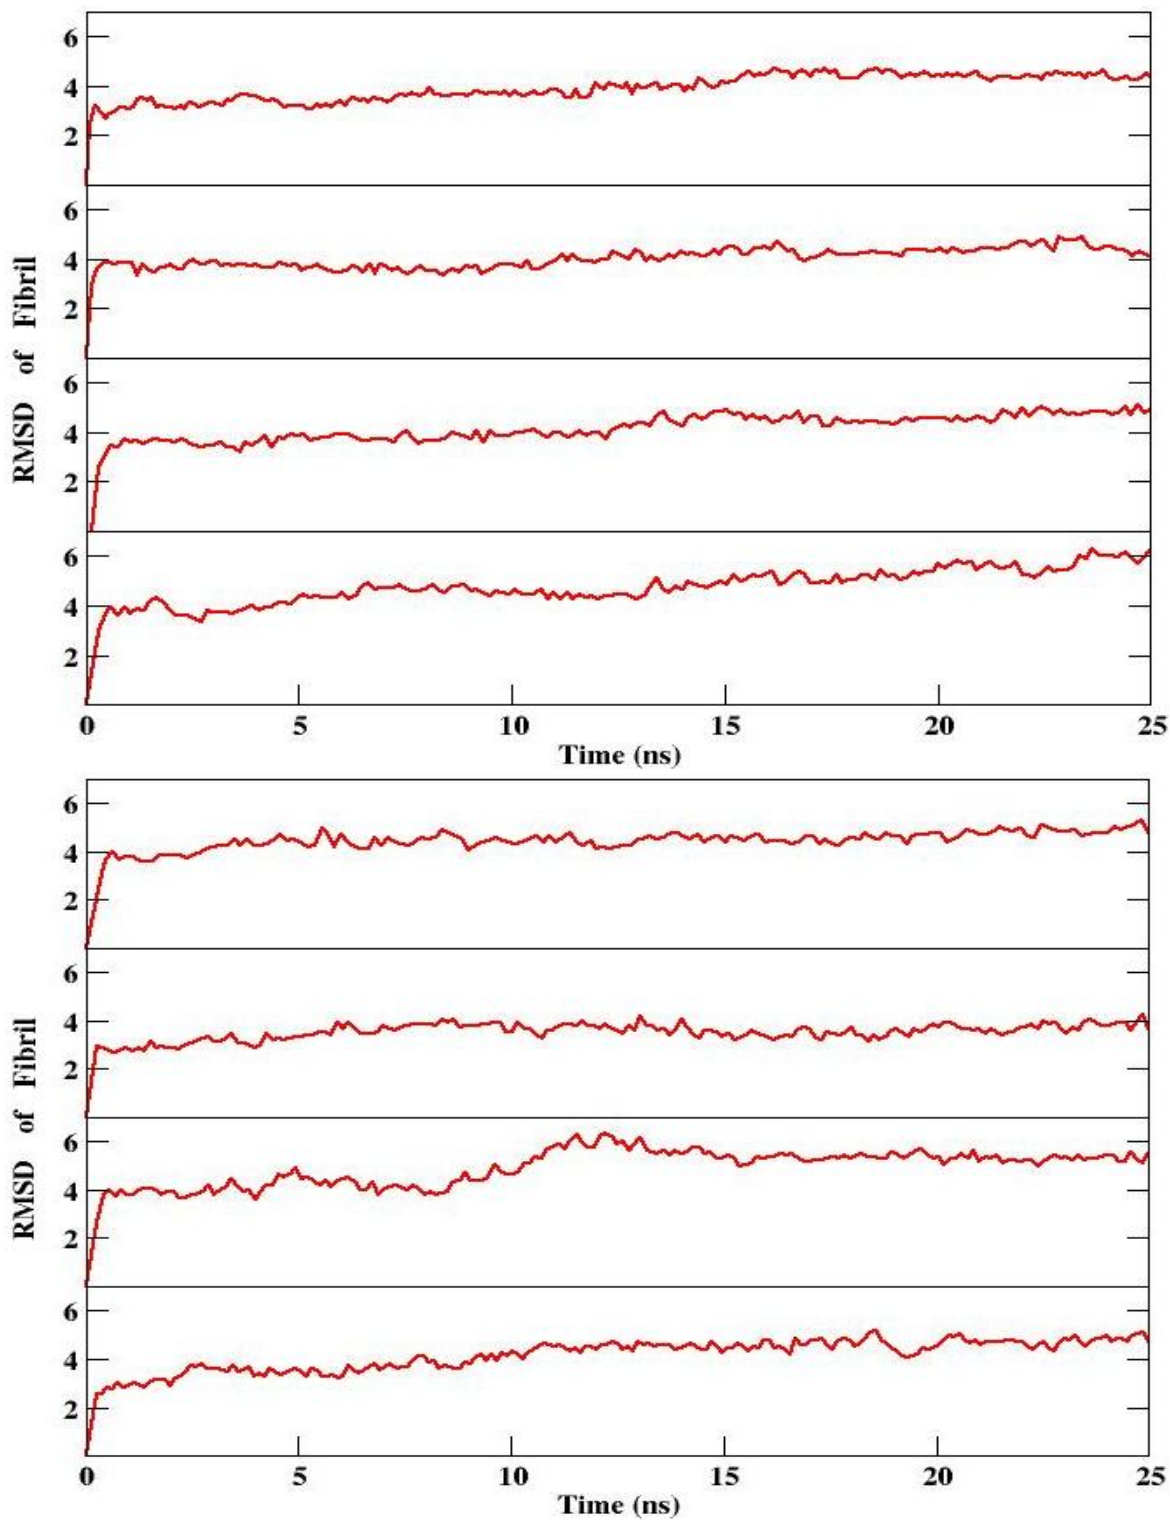

Figure S3 Binding of two CR molecules (red and black line) to the A $\beta$ <sub>9-40</sub> protofibril in for 8 trajectories. The distance cutoff for atom contacts between dye and the cross- $\beta$ -subunit is set to be 3 Å. If the number of atom contacts is bigger than 20, then the system is designated as being in the bound state, otherwise it belongs the unbound state.

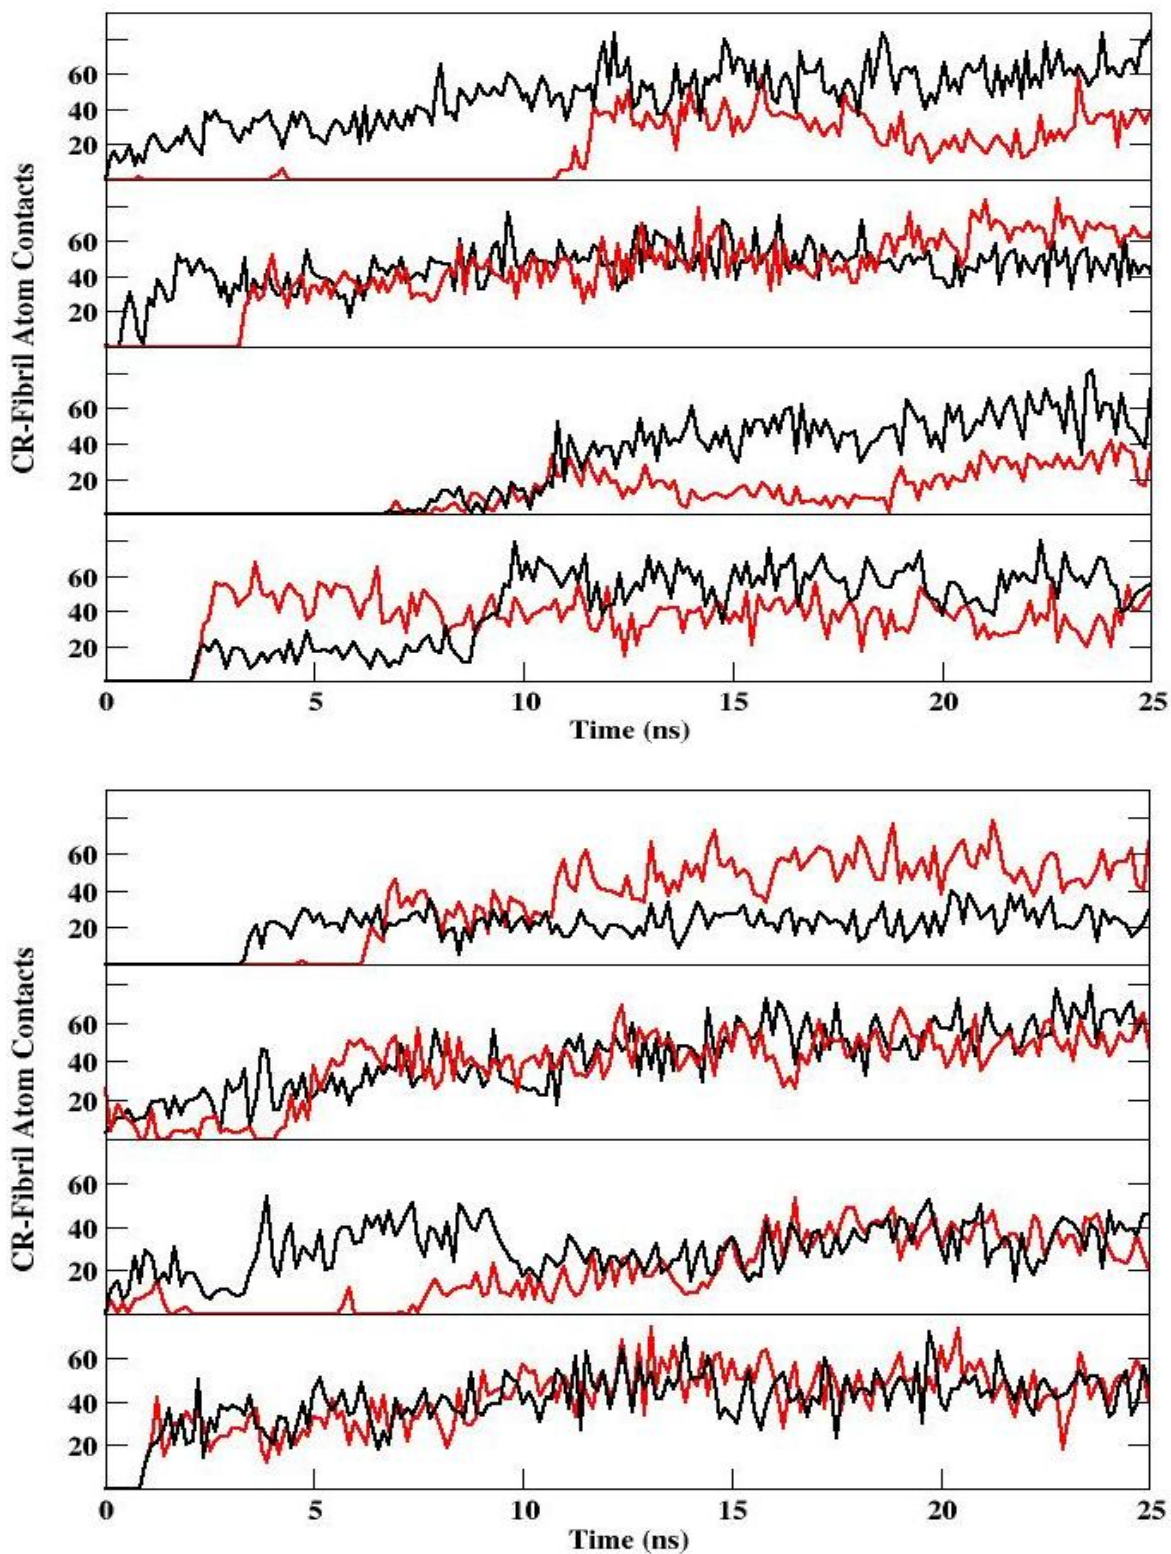

Figure S4 The initial and final contacts between the protofibril and two CRs in the eight trajectories.

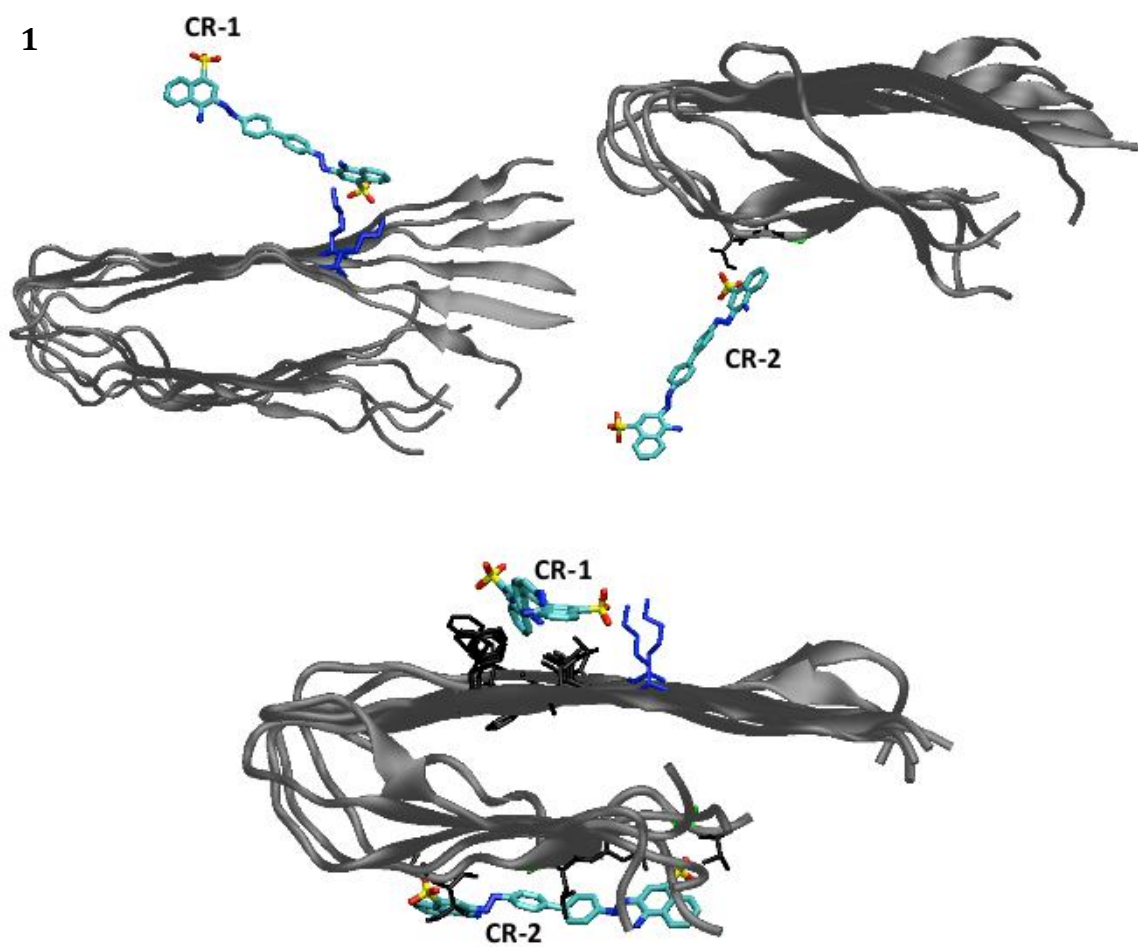

2

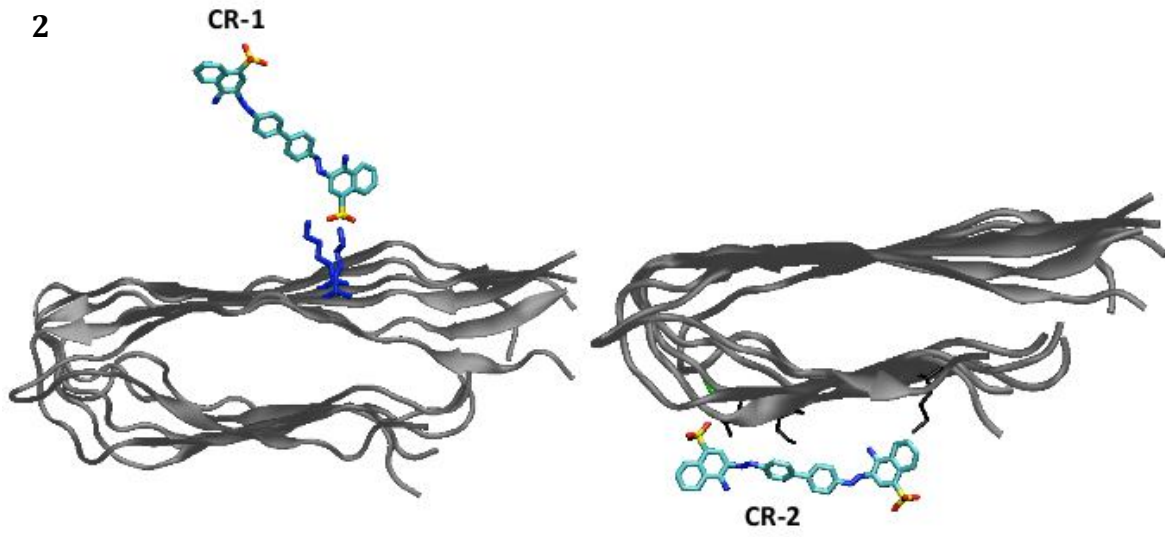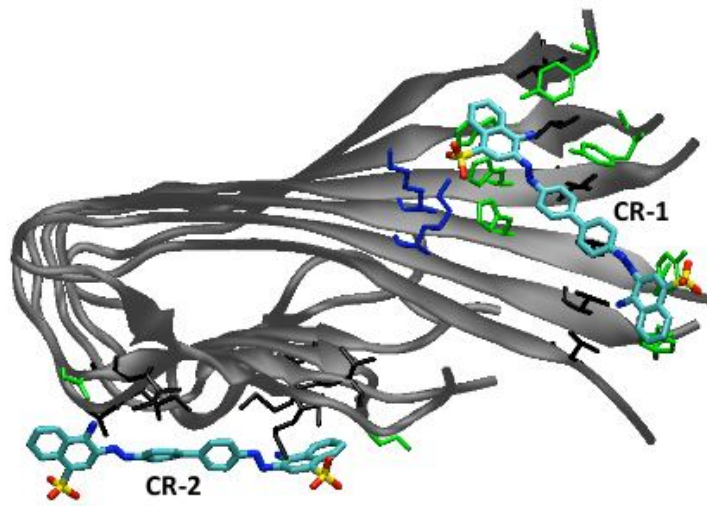

3

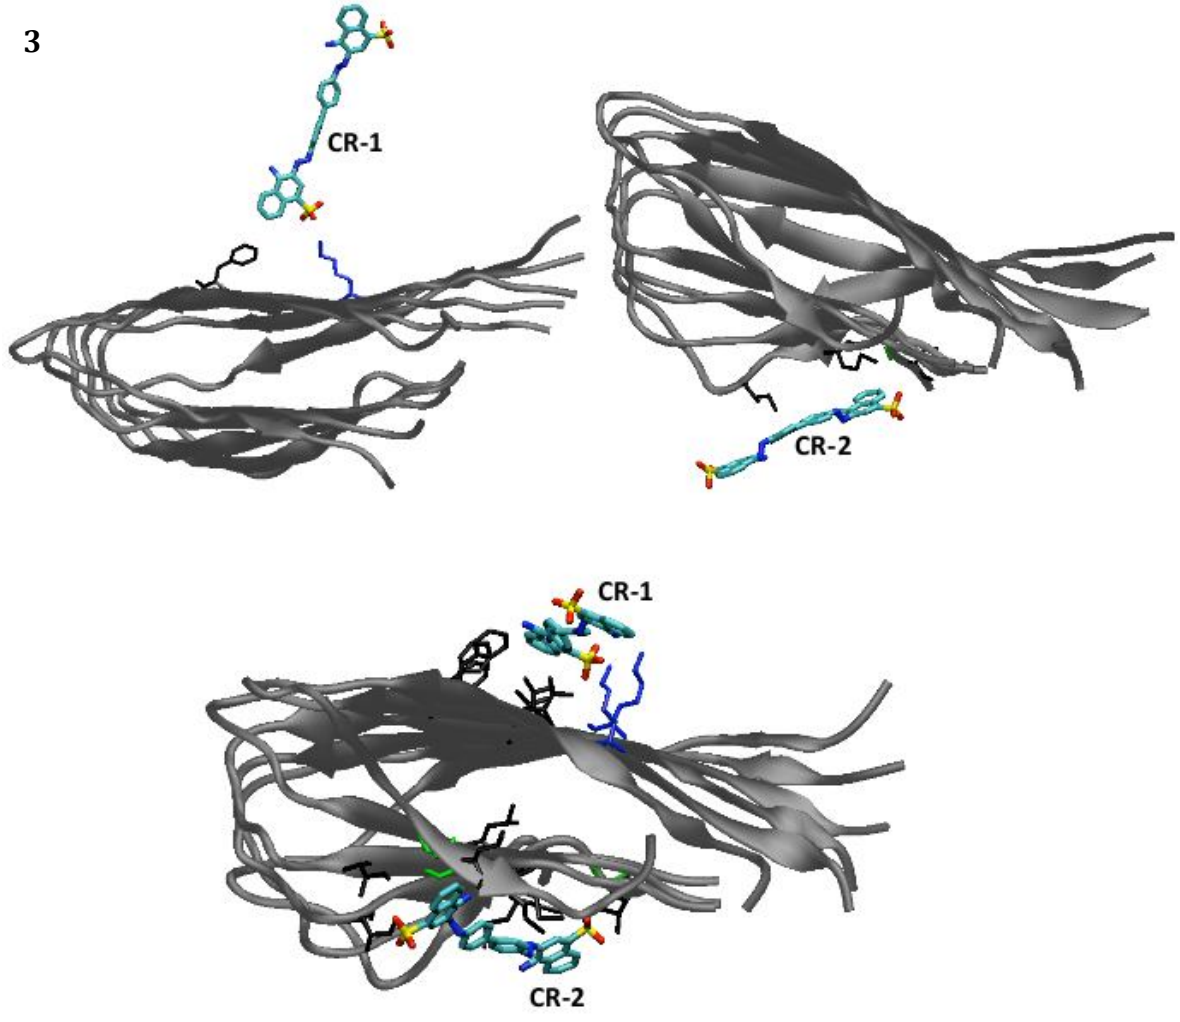

4

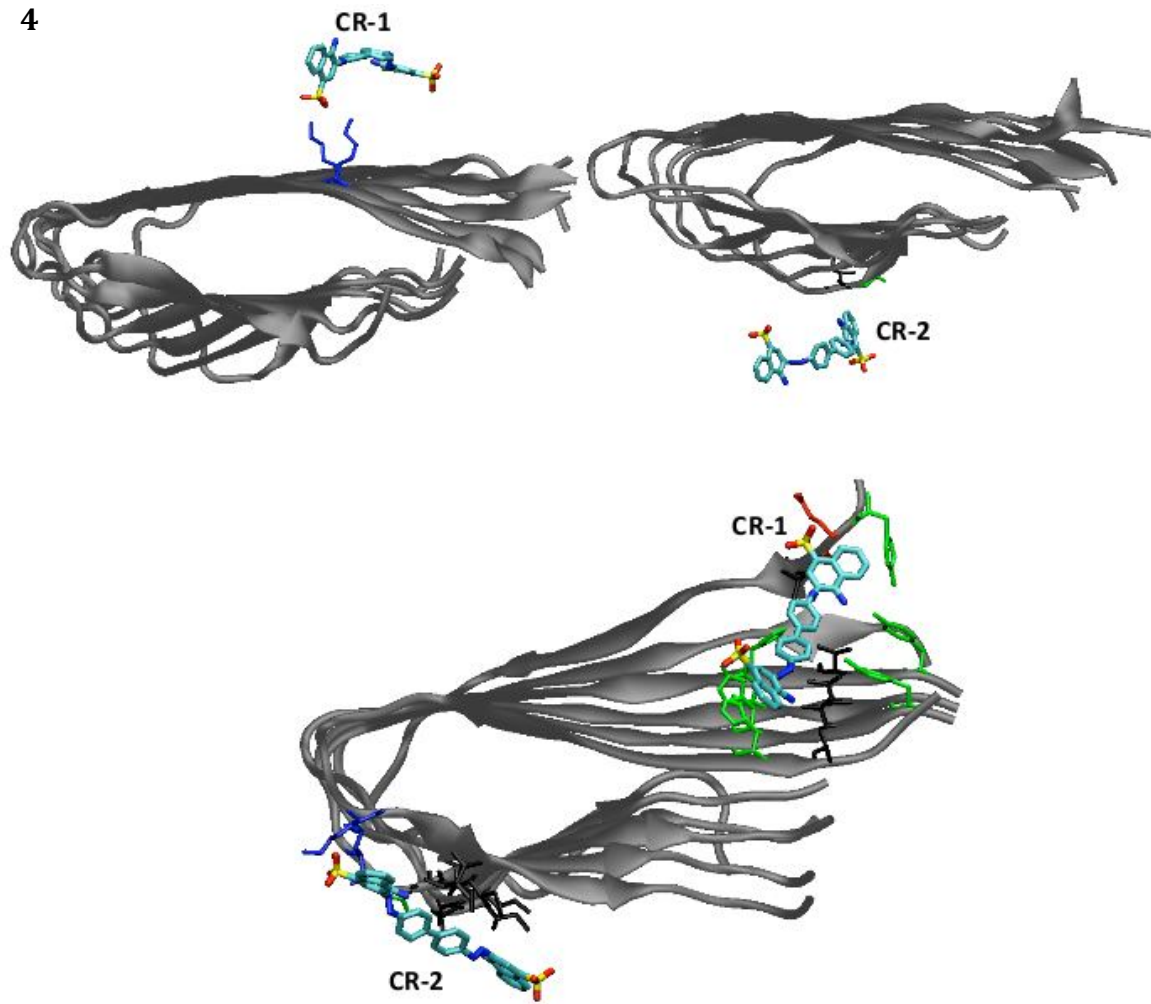

5

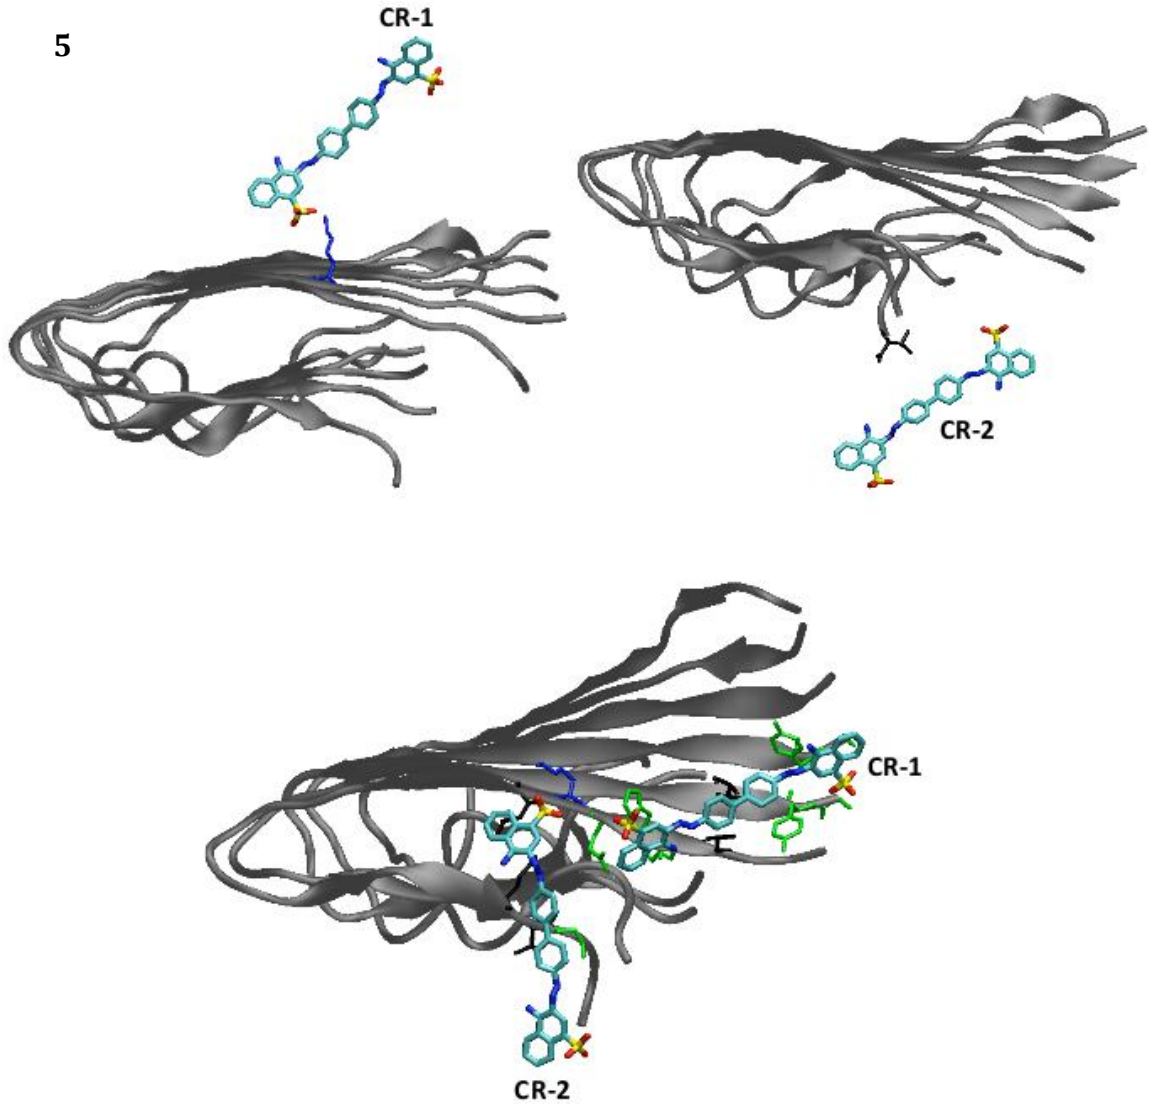



6

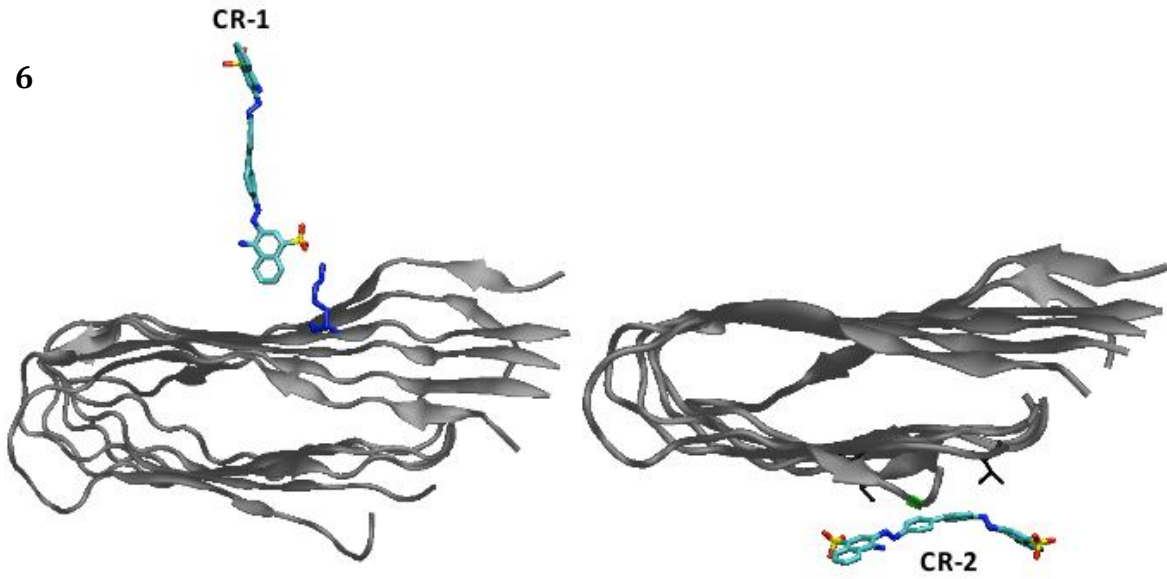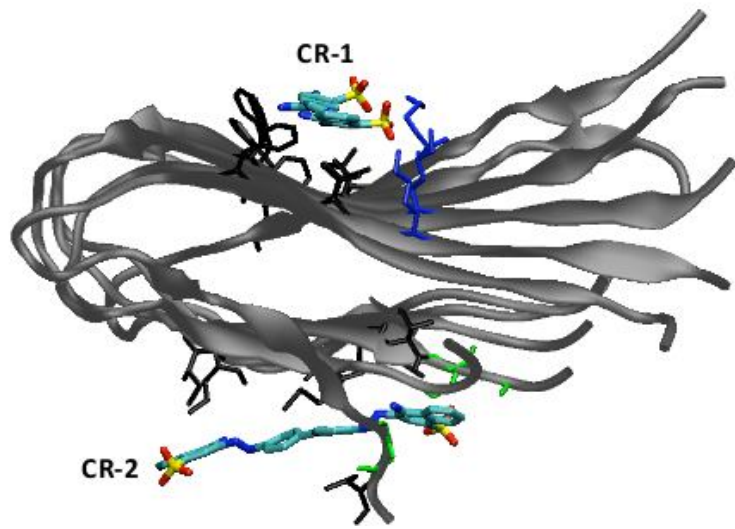

7

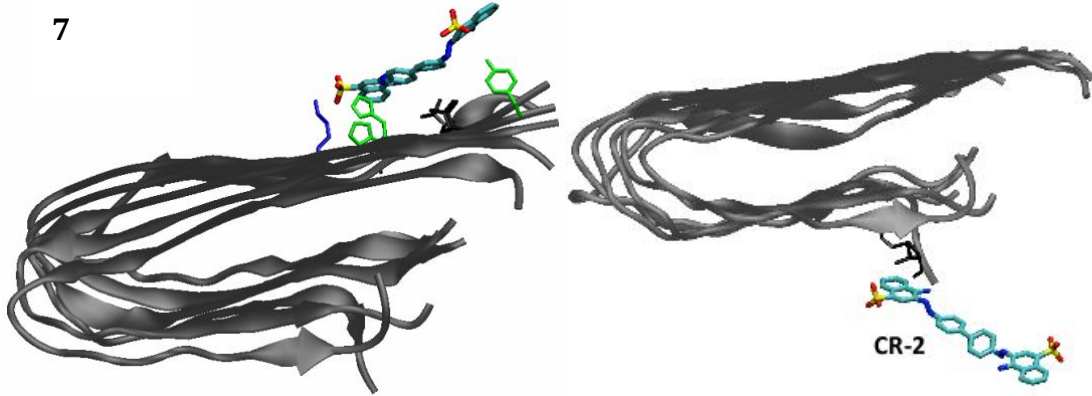

CR-2

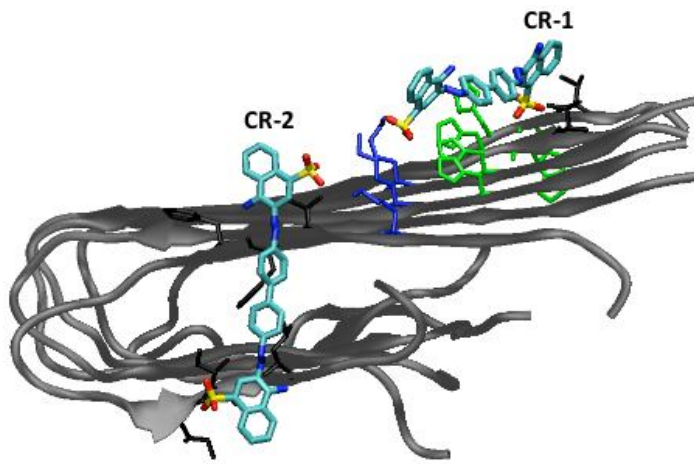

CR-1

CR-2

8

CR Dimer

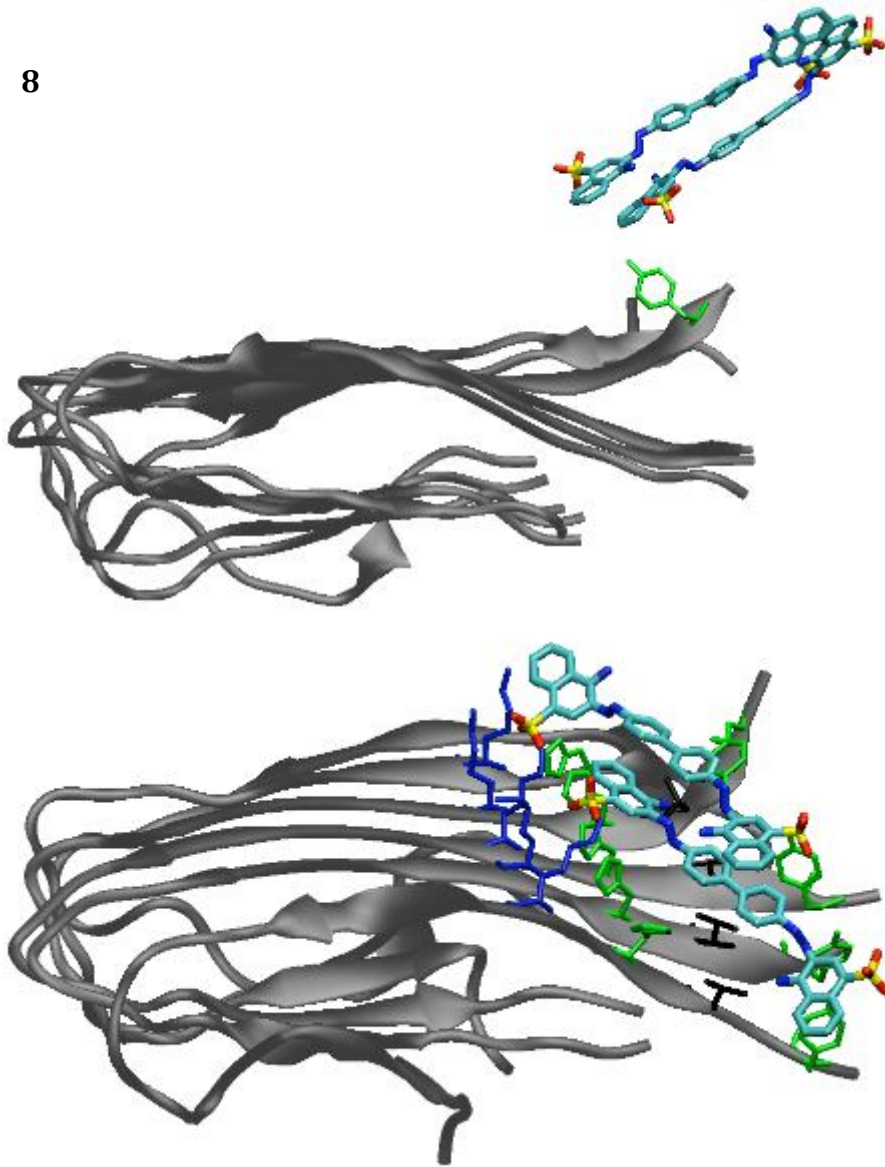

Figure S5 The centroid structures from the clustering. The centroids are further merged into different binding types (Type I-VII) based on binding sites.

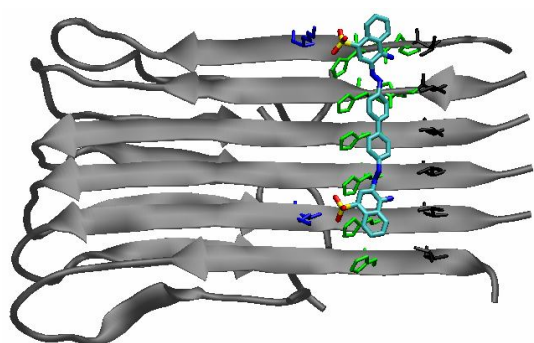

**Type I** 13.98%

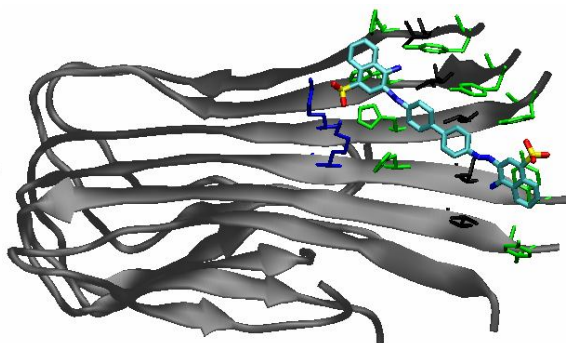

**Type I** 5.98%

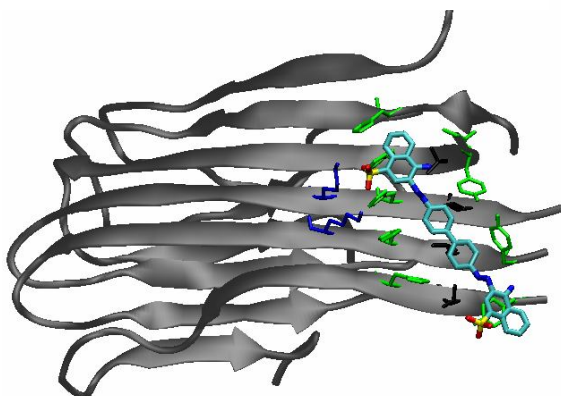

**Type I** 4.81%

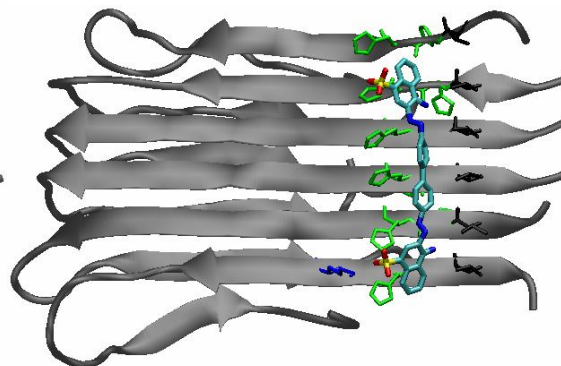

**Type I** 1.93%

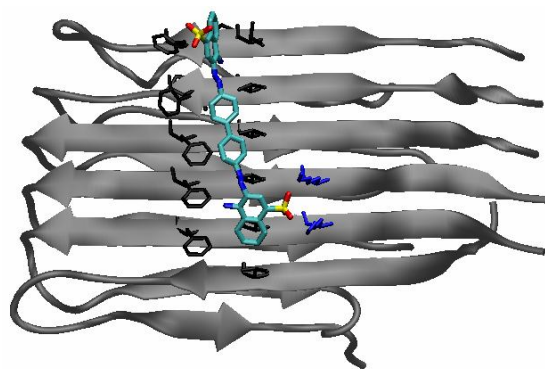

**Type II** 14.3%

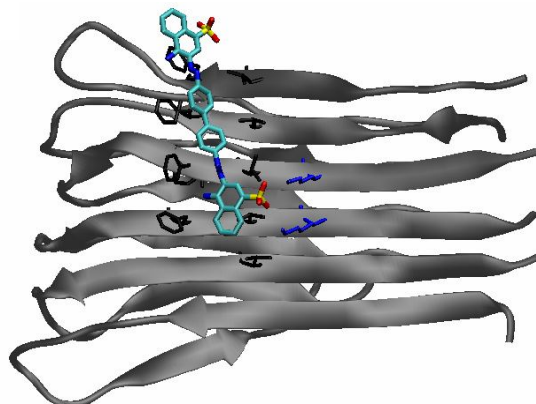

**Type II** 7.15%

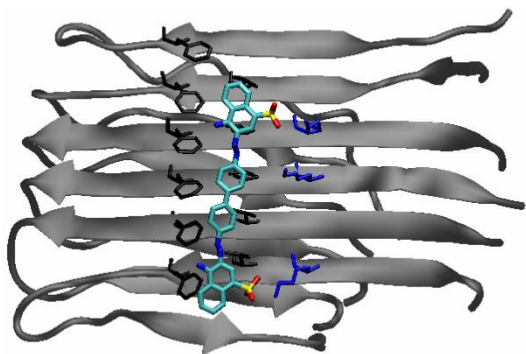

**Type II** 2.74%

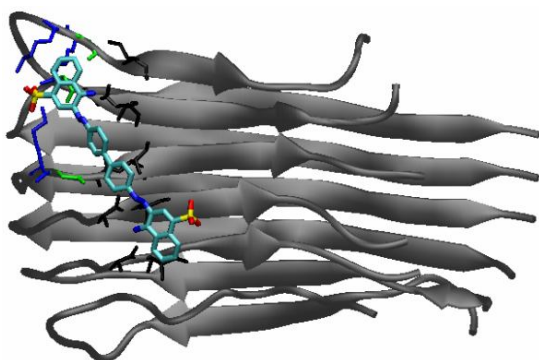

**Type III** 5.76%

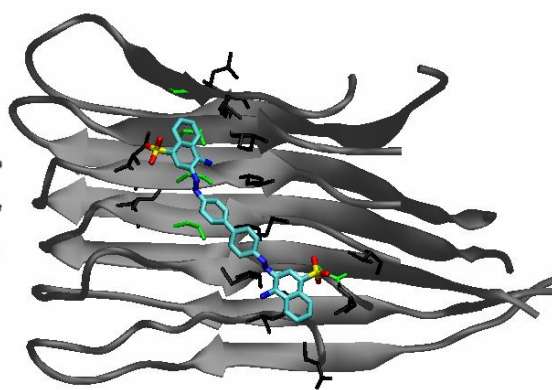

**Type IV** 4.79%

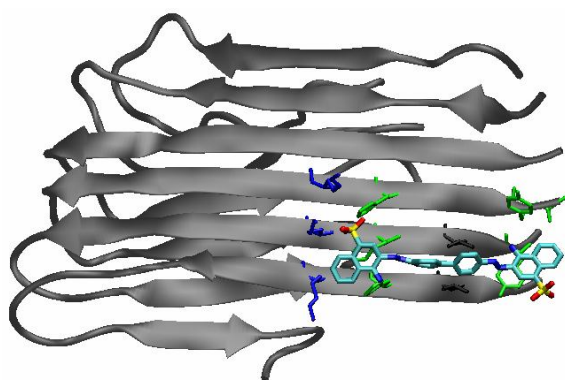

**Type V** 3.10%

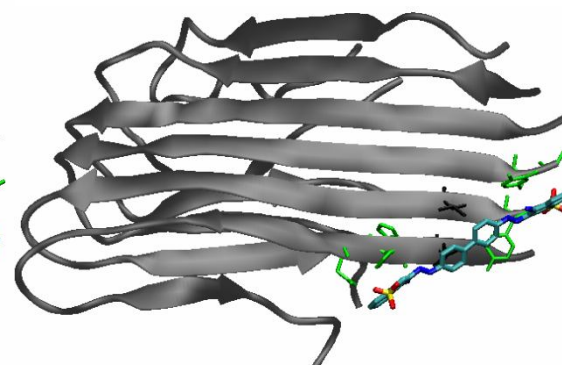

**Type V** 1.51 %

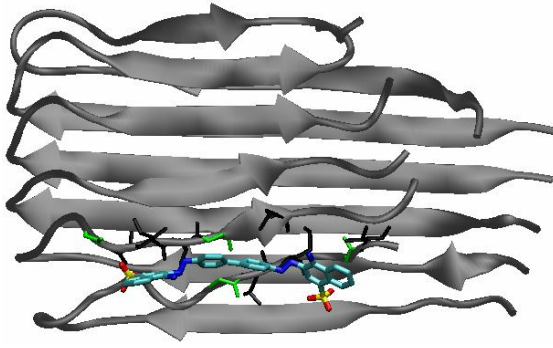

**Type VI** 8.09%

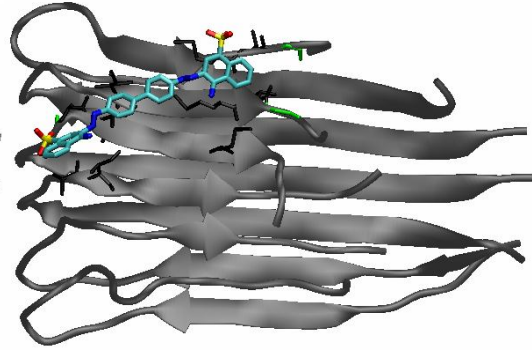

**Type VI** 6.29%

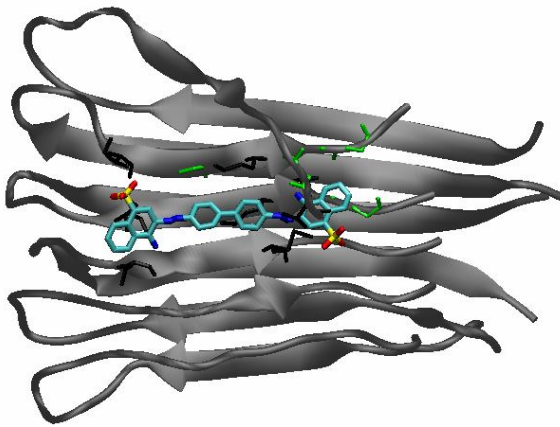

**Type VI** 1.93%

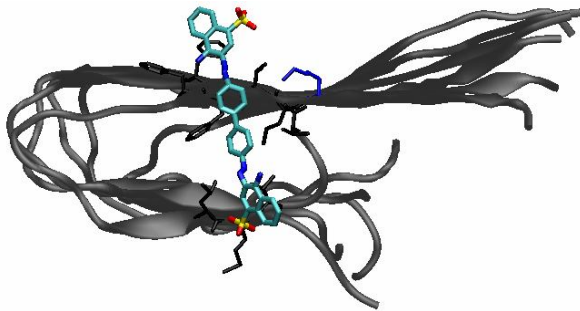

**Type VII** 10.16%

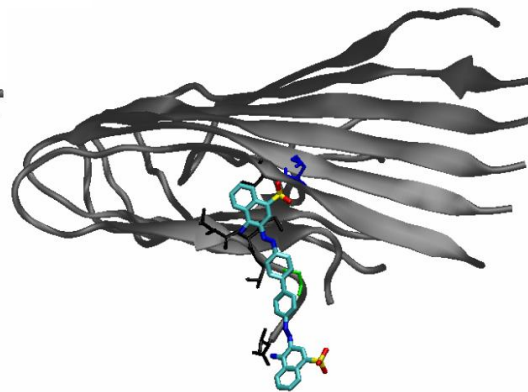

**Type VII** 2.47%

Figure S6 Auto-correlation function of the Central torsion angle of CR. Top 1: One free CR Top 2-4: Two CR molecules (red and black) bound to the  $A\beta_{9-40}$  protofibril. The fitted lines to exponential decay are in solid, the data points are in cycles.

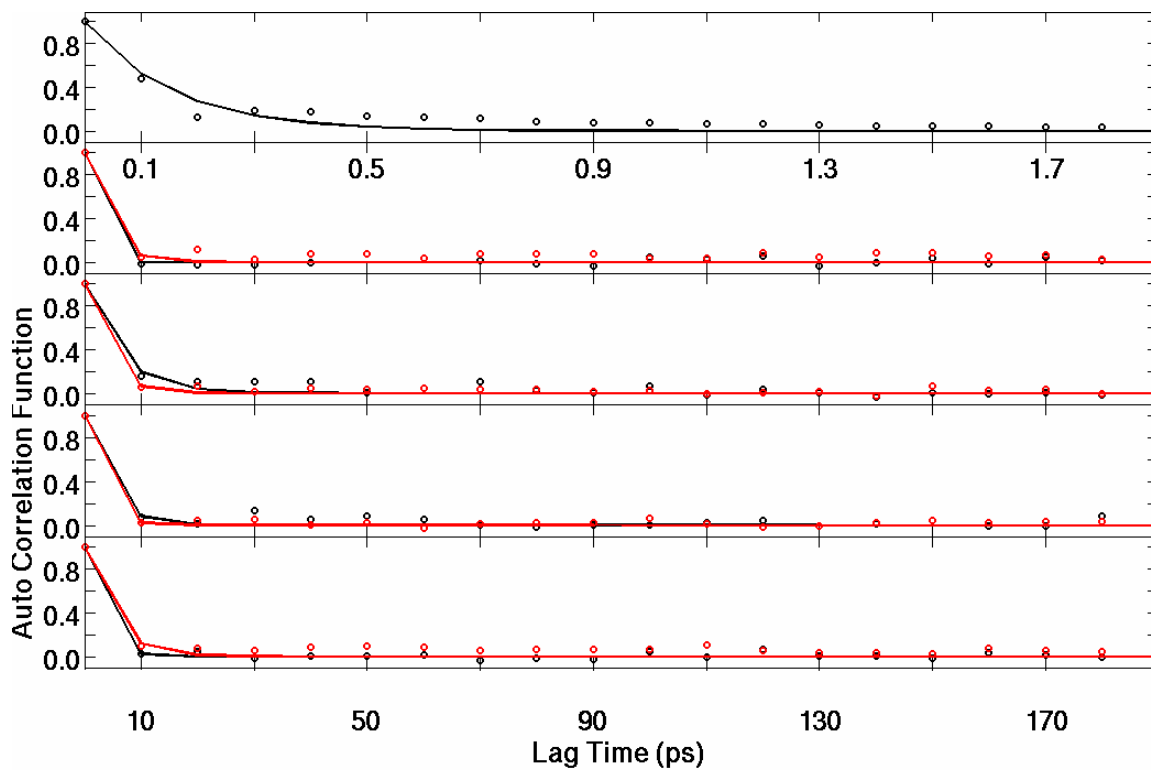

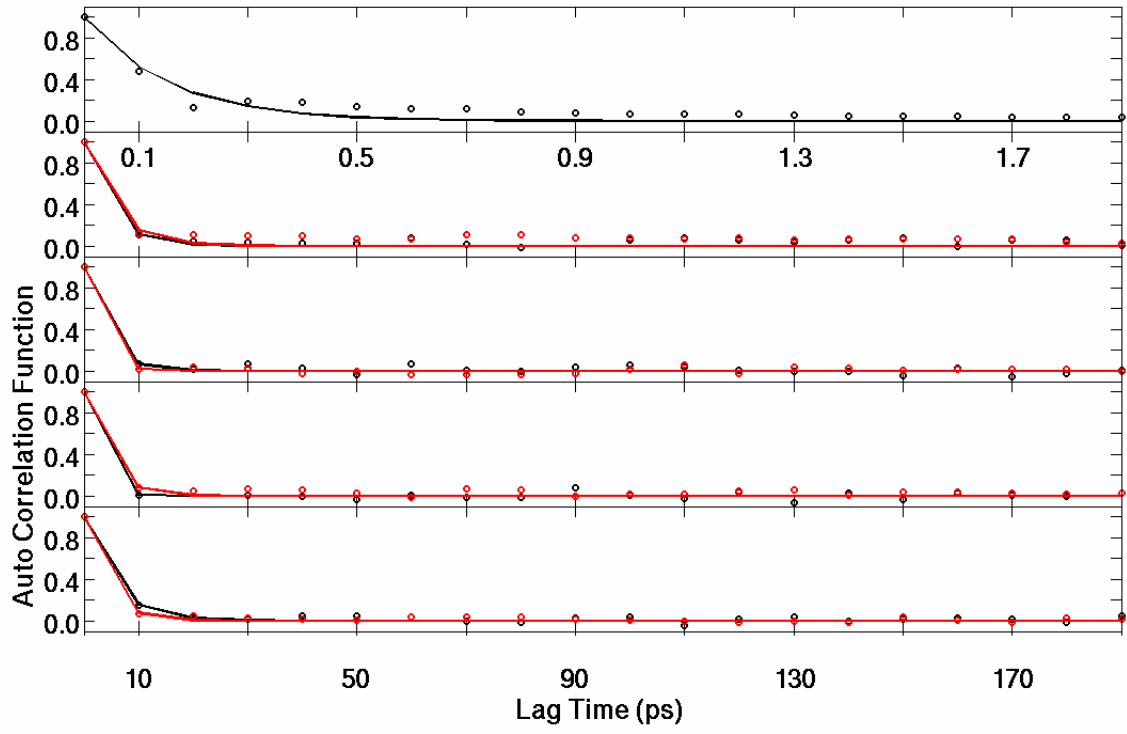



Figure S7 Long range twisting of A $\beta$ <sub>9-40</sub> fibril.

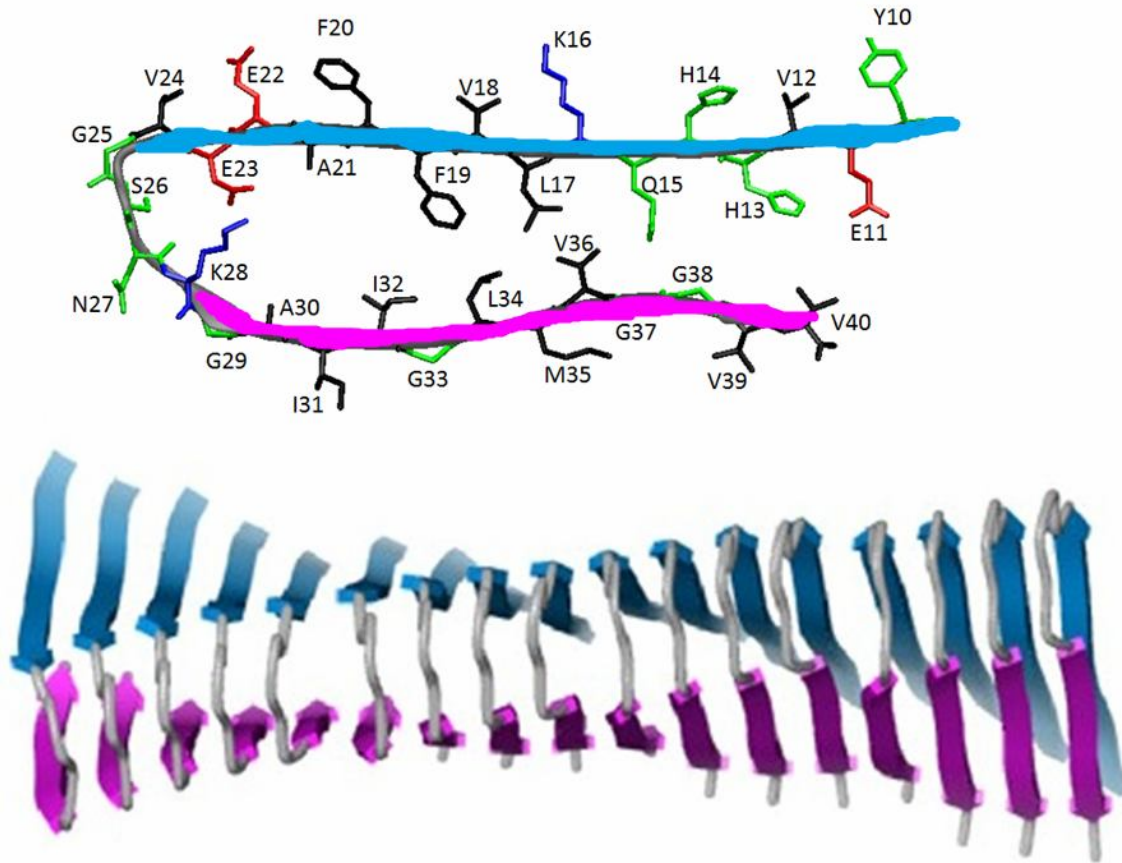

The fibril structure is adapted from reference 1

#### Reference

1. Kajava, A. V., U. Baxa, and A. C. Steven. 2010.  $\beta$ -arcades: recurring motifs in naturally occurring and disease-related amyloid fibrils. *Faseb Journal* 24:1311-1319.

Appendix A the force field of acidic Congo red molecule in MOL2 format

@<TRIPOS>MOLECULE

CRA

68 73 1 0 1

SMALL

USER\_CHARGES

@<TRIPOS>ATOM

|    |     |           |           |           |    |   |     |         |      |
|----|-----|-----------|-----------|-----------|----|---|-----|---------|------|
| 1  | C9  | 3.536914  | 1.422858  | -0.000002 | ca | 1 | CRA | -0.0885 | **** |
| 2  | C10 | 4.956279  | 1.392528  | 0.061005  | ca | 1 | CRA | 0.0362  | **** |
| 3  | C1  | 5.732216  | 2.522086  | 0.500030  | ca | 1 | CRA | -0.1512 | **** |
| 4  | S1  | 4.948198  | 4.068812  | 0.990089  | sy | 1 | CRA | 1.1310  | **** |
| 5  | O1  | 6.050543  | 4.933870  | 1.355071  | o  | 1 | CRA | -0.6604 | **** |
| 6  | O2  | 4.220306  | 4.491489  | -0.193051 | o  | 1 | CRA | -0.6604 | **** |
| 7  | O3  | 4.082160  | 3.703296  | 2.096742  | o  | 1 | CRA | -0.6604 | **** |
| 8  | C2  | 7.076907  | 2.424663  | 0.546015  | ca | 1 | CRA | -0.0825 | **** |
| 9  | H1  | 7.652192  | 3.263577  | 0.877937  | ha | 1 | CRA | 0.0944  | **** |
| 10 | H5  | 3.030305  | 2.323749  | 0.272951  | ha | 1 | CRA | 0.1423  | **** |
| 11 | C8  | 2.830146  | 0.327778  | -0.391921 | ca | 1 | CRA | -0.1353 | **** |
| 12 | H4  | 1.754774  | 0.374754  | -0.427927 | ha | 1 | CRA | 0.1231  | **** |
| 13 | C7  | 3.488250  | -0.869679 | -0.735836 | ca | 1 | CRA | -0.2128 | **** |
| 14 | H3  | 2.917042  | -1.736536 | -1.018780 | ha | 1 | CRA | 0.1337  | **** |
| 15 | C6  | 4.846301  | -0.929113 | -0.693838 | ca | 1 | CRA | -0.1513 | **** |
| 16 | H2  | 5.344154  | -1.852353 | -0.919892 | ha | 1 | CRA | 0.1282  | **** |
| 17 | C5  | 5.613347  | 0.202582  | -0.313748 | ca | 1 | CRA | 0.0508  | **** |
| 18 | C4  | 7.047269  | 0.148283  | -0.301753 | ca | 1 | CRA | 0.1944  | **** |
| 19 | N3  | 7.684422  | -1.032419 | -0.701728 | nh | 1 | CRA | -0.8470 | **** |
| 20 | H21 | 7.338134  | -1.383010 | -1.569584 | hn | 1 | CRA | 0.3410  | **** |
| 21 | H22 | 8.673659  | -0.909502 | -0.749753 | hn | 1 | CRA | 0.3410  | **** |
| 22 | C3  | 7.751272  | 1.239686  | 0.134274  | ca | 1 | CRA | 0.0598  | **** |
| 23 | N1  | 9.154672  | 1.116319  | 0.111270  | ne | 1 | CRA | -0.1008 | **** |
| 24 | N2  | 9.802728  | 2.060286  | 0.538160  | nf | 1 | CRA | -0.0748 | **** |
| 25 | C11 | 11.210626 | 1.906979  | 0.491164  | ca | 1 | CRA | 0.1248  | **** |
| 26 | C16 | 11.950411 | 3.026196  | 0.839110  | ca | 1 | CRA | -0.1583 | **** |
| 27 | C15 | 13.334853 | 2.990780  | 0.822102  | ca | 1 | CRA | -0.1306 | **** |
| 28 | H8  | 13.888410 | 3.866109  | 1.110198  | ha | 1 | CRA | 0.1311  | **** |
| 29 | H9  | 11.425493 | 3.919624  | 1.125244  | ha | 1 | CRA | 0.1191  | **** |
| 30 | C12 | 11.879813 | 0.738241  | 0.139162  | ca | 1 | CRA | -0.1583 | **** |
| 31 | H6  | 11.318324 | -0.135027 | -0.127891 | ha | 1 | CRA | 0.1191  | **** |
| 32 | C13 | 13.258403 | 0.706832  | 0.127160  | ca | 1 | CRA | -0.1306 | **** |
| 33 | H7  | 13.759994 | -0.197069 | -0.167786 | ha | 1 | CRA | 0.1311  | **** |
| 34 | C14 | 14.015577 | 1.832643  | 0.464268  | cp | 1 | CRA | 0.0019  | **** |
| 35 | C17 | 15.503704 | 1.789414  | 0.437264  | cp | 1 | CRA | 0.0019  | **** |

|        |           |           |           |    |       |         |      |
|--------|-----------|-----------|-----------|----|-------|---------|------|
| 36 C19 | 16.203782 | 0.698677  | 0.942302  | ca | 1 CRA | -0.1306 | **** |
| 37 C21 | 17.587700 | 0.660263  | 0.903311  | ca | 1 CRA | -0.1583 | **** |
| 38 H13 | 18.127495 | -0.183080 | 1.294488  | ha | 1 CRA | 0.1191  | **** |
| 39 H11 | 15.667503 | -0.121027 | 1.385152  | ha | 1 CRA | 0.1311  | **** |
| 40 C18 | 16.240667 | 2.843698  | -0.107694 | ca | 1 CRA | -0.1306 | **** |
| 41 H10 | 15.722954 | 3.684959  | -0.531815 | ha | 1 CRA | 0.1311  | **** |
| 42 C20 | 17.619910 | 2.814284  | -0.142709 | ca | 1 CRA | -0.1583 | **** |
| 43 H12 | 18.166428 | 3.626374  | -0.579756 | ha | 1 CRA | 0.1191  | **** |
| 44 C22 | 18.308172 | 1.717269  | 0.370420  | ca | 1 CRA | 0.1248  | **** |
| 45 N4  | 19.718677 | 1.571885  | 0.378406  | ne | 1 CRA | -0.0748 | **** |
| 46 N5  | 20.352544 | 2.572670  | 0.078530  | nf | 1 CRA | -0.1008 | **** |
| 47 C23 | 21.756362 | 2.464335  | 0.073513  | ca | 1 CRA | 0.0598  | **** |
| 48 C25 | 22.441076 | 3.595375  | -0.285395 | ca | 1 CRA | 0.1944  | **** |
| 49 N6  | 21.781714 | 4.771413  | -0.662458 | nh | 1 CRA | -0.8470 | **** |
| 50 H19 | 22.149161 | 5.583020  | -0.210486 | hn | 1 CRA | 0.3410  | **** |
| 51 H20 | 20.800293 | 4.703598  | -0.500524 | hn | 1 CRA | 0.3410  | **** |
| 52 C24 | 22.451446 | 1.276891  | 0.440407  | ca | 1 CRA | -0.0825 | **** |
| 53 H14 | 21.891063 | 0.408797  | 0.718405  | ha | 1 CRA | 0.0944  | **** |
| 54 C26 | 23.800355 | 1.230425  | 0.468394  | ca | 1 CRA | -0.1512 | **** |
| 55 S2  | 24.614042 | -0.293756 | 0.980244  | sy | 1 CRA | 1.1310  | **** |
| 56 O4  | 23.525743 | -1.203803 | 1.275235  | o  | 1 CRA | -0.6604 | **** |
| 57 O5  | 25.402130 | 0.092585  | 2.136947  | o  | 1 CRA | -0.6604 | **** |
| 58 O6  | 25.421481 | -0.676097 | -0.164379 | o  | 1 CRA | -0.6604 | **** |
| 59 C28 | 24.555062 | 2.393675  | 0.087461  | ca | 1 CRA | 0.0362  | **** |
| 60 C27 | 23.874738 | 3.563645  | -0.311601 | ca | 1 CRA | 0.0508  | **** |
| 61 C29 | 24.620597 | 4.692021  | -0.740579 | ca | 1 CRA | -0.1513 | **** |
| 62 H15 | 24.101806 | 5.560321  | -1.101670 | ha | 1 CRA | 0.1282  | **** |
| 63 C31 | 25.980469 | 4.673581  | -0.737585 | ca | 1 CRA | -0.2128 | **** |
| 64 H17 | 26.533926 | 5.533746  | -1.071616 | ha | 1 CRA | 0.1337  | **** |
| 65 C32 | 26.662420 | 3.517221  | -0.309736 | ca | 1 CRA | -0.1353 | **** |
| 66 H18 | 27.738342 | 3.505231  | -0.304730 | ha | 1 CRA | 0.1231  | **** |
| 67 C30 | 25.975651 | 2.410187  | 0.084150  | ca | 1 CRA | -0.0885 | **** |
| 68 H16 | 26.500259 | 1.532213  | 0.395129  | ha | 1 CRA | 0.1423  | **** |

@<TRIPOS>BOND

|   |   |    |   |
|---|---|----|---|
| 1 | 1 | 2  | 1 |
| 2 | 1 | 10 | 1 |
| 3 | 1 | 11 | 1 |
| 4 | 2 | 3  | 1 |
| 5 | 2 | 17 | 1 |
| 6 | 3 | 4  | 1 |
| 7 | 3 | 8  | 1 |
| 8 | 4 | 5  | 1 |
| 9 | 4 | 6  | 1 |

10 4 7 1  
11 8 9 1  
12 8 22 1  
13 11 12 1  
14 11 13 1  
15 13 14 1  
16 13 15 1  
17 15 16 1  
18 15 17 1  
19 17 18 1  
20 18 19 1  
21 18 22 1  
22 19 20 1  
23 19 21 1  
24 22 23 1  
25 23 24 1  
26 24 25 1  
27 25 26 1  
28 25 30 1  
29 26 27 1  
30 26 29 1  
31 27 28 1  
32 27 34 1  
33 30 31 1  
34 30 32 1  
35 32 33 1  
36 32 34 1  
37 34 35 1  
38 35 36 1  
39 35 40 1  
40 36 37 1  
41 36 39 1  
42 37 38 1  
43 37 44 1  
44 40 41 1  
45 40 42 1  
46 42 43 1  
47 42 44 1  
48 44 45 1  
49 45 46 1  
50 46 47 1  
51 47 48 1  
52 47 52 1

53 48 49 1  
54 48 60 1  
55 49 50 1  
56 49 51 1  
57 52 53 1  
58 52 54 1  
59 54 55 1  
60 54 59 1  
61 55 56 1  
62 55 57 1  
63 55 58 1  
64 59 60 1  
65 59 67 1  
66 60 61 1  
67 61 62 1  
68 61 63 1  
69 63 64 1  
70 63 65 1  
71 65 66 1  
72 65 67 1  
73 67 68 1

@<TRIPOS>SUBSTRUCTURE

1 CRA            1 \*\*\*\*            0 \*\*\*\* \*\*
